# Supplementary material for: A label-free amperometric immunosensor with improved electrocatalytic 3D braided AuPtCu-SWCNTs@MoS2-rGO for human growth differentiation factor-15 detection
Source: Royal Society of Chemistry journal article supplement (doi:10.1039/d1ay02198b), 2022-01-01
Supplement: d1ay02198b1.pdf [file d1ay02198b1.pdf]

## Supporting information

1

2

### **A label-free amperometric immunosensor with improved electrocatalytic 3D braided AuPtCu- SWCNTs@MoS<sub>2</sub>-rGO for human growth differentiation factor-15 detection**

7

8 Yinghui Jiao<sup>a, 1</sup>, Zhiyu Huang<sup>a\*</sup>, Mei Chen<sup>b, 1</sup>, Xiaojun Zhou<sup>d</sup>, Hongsheng Lu<sup>a</sup>,

9 Baogang Wang<sup>a\*</sup>, Xiaozhen Dai<sup>c\*</sup>

10 <sup>a</sup>College of Chemistry and Chemical Engineering, Southwest Petroleum University, C

11 hengdu 610500, P. R. China

12 <sup>b</sup>Clinical Medical College and The First Affiliated Hospital of Chengdu Medical

13 College, Chengdu, Sichuan 610500, P.R. China

14 <sup>c</sup>School of Bioscience and Technology, Chengdu Medical College, Chengdu, Sichuan

15 610500, P.R. China

16 <sup>d</sup>Chengdu Coe Technology Co., LTD, Chengdu, Sichuan 611731, P.R. China

17 <sup>1</sup>Those authors contribute equally to this work.

18 \*Corresponding authors

19 E-mail address: 396762073@qq.com (Z.Y. Huang).

20 Tel.: +862862739583; fax: +862862739582.

21

22

23

24

## Contents

### 25 1. EDS spectrum of A@M nanocomposites

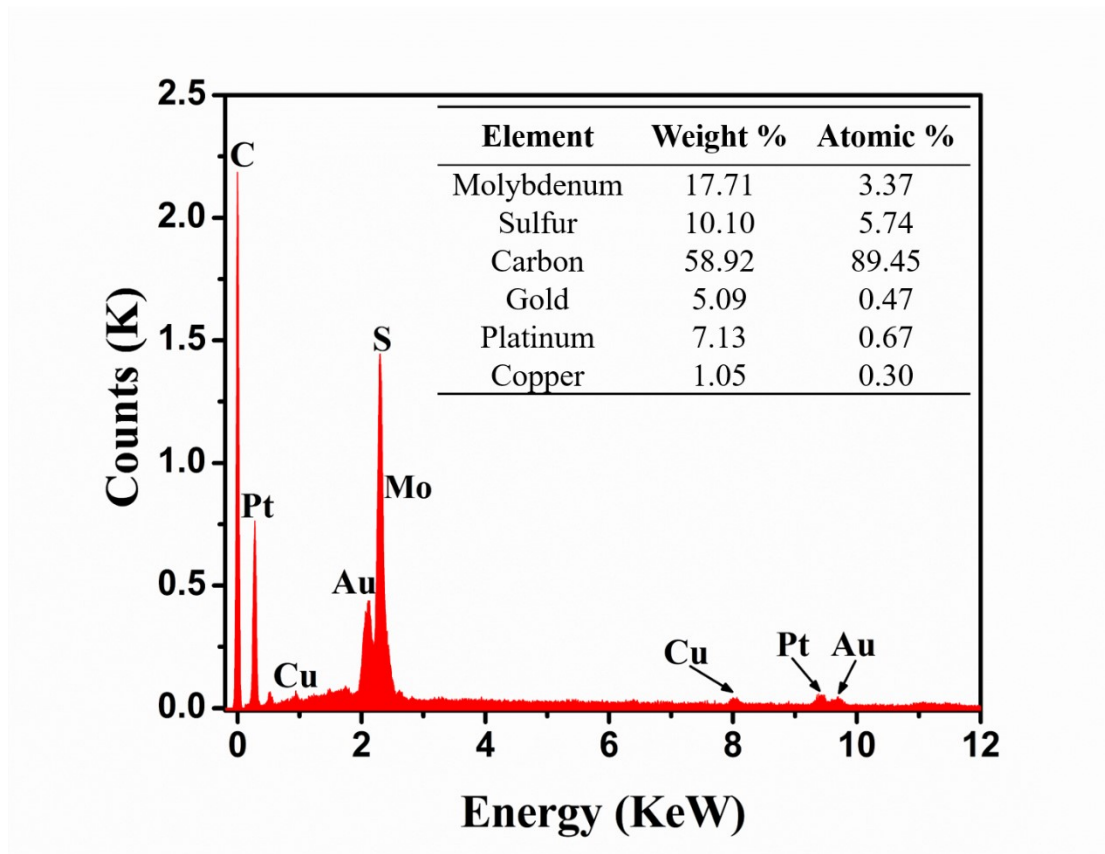

26

27 Fig S1. EDS spectrum of AuPtCu NFs-SWCNTs@MoS<sub>2</sub>-rGO nanocomposites.

28

### 29 2. Optimization of experimental conditions

30 To obtain the optimal conditions for GDF 15 determination, the incubation volume  
31 of A@M, pH of PBS, and concentration of H<sub>2</sub>O<sub>2</sub> were optimized.

32 The volume of the electrode surface modifies the thickness of the interfacial film.  
33 When the modification volume was very low, the interfacial film was too thin to achieve  
34 the highest electrical performance. However, excessive modification prevents the  
35 migration of electrons on the electrode surface. The results obtained after dropping

36 different volumes of A@M on the surface of the GCE are shown in Fig. 4A. The current  
37 gradually increased when the volume of A@M was increased from 3 to 6  $\mu\text{L}$ , and  
38 gradually decreased when the volume was further increased from 6 to 9  $\mu\text{L}$ , illustrating  
39 that when the incubation volume was 6  $\mu\text{L}$ , the working electrode surface had the best  
40 electrical properties.

41 PBS (10 mL, 10 mmol  $\text{L}^{-1}$ ) was used as the electrolyte solution when detecting  
42 GDF 15. Studies have shown that the pH of PBS strongly impacts the detection results  
43 of immunosensors, as several bioactive substances are used during the self-assembly  
44 process of the immunosensor, and an extremely acidic or alkaline environment can  
45 destroy protein activity. The volume of A@M was retained at 6  $\mu\text{L}$ , and PBS solutions  
46 with different pH values were tested using the amperometric I–T curve. The current  
47 slowly increased when pH increased from 5.55 to 7.46 (Fig. 4B), and then gradually  
48 decreased between pH 7.46 and 8.76. Thus, PBS (pH 7.46) was selected as the optimum  
49 electrolyte.

50 A@M facilitates catalytic reduction of  $\text{H}_2\text{O}_2$ , which can accelerate the electron  
51 migration rate on the electrode surface, amplify the electrical signals, and improve  
52 sensitivity. Therefore, we evaluated the reducibility of the sensor using different  
53 concentrations of  $\text{H}_2\text{O}_2$ . As shown in Fig. 4C, the current responses gradually increased  
54 with increasing concentrations of  $\text{H}_2\text{O}_2$  over the range of 10–35  $\text{mmol}\cdot\text{L}^{-1}$ , and then  
55 stabilized when concentration varied from 35–45  $\text{mmol}\cdot\text{L}^{-1}$ . Thus, the optimal  
56 concentration of  $\text{H}_2\text{O}_2$  was 35  $\text{mmol}\cdot\text{L}^{-1}$ .

57
